# Supplementary material for: De novo lipogenesis is elicited dramatically in human hepatocellular carcinoma especially in hepatitis C virus‐induced hepatocellular carcinoma
Source: PubMed Central journal article supplement (PMC8491216; doi:10.1002/mco2.15), 2020-07-09
Supplement: MCO2-1-178-s002.pdf [file MCO2-1-178-s002.pdf]

|              |        |    |                          |   |      |              |     |              |                           |                                    |                             |             |              |             |             |
|--------------|--------|----|--------------------------|---|------|--------------|-----|--------------|---------------------------|------------------------------------|-----------------------------|-------------|--------------|-------------|-------------|
| TCGA-DD-A73A | MALE   | 71 | Hepatocellular Carcinoma | 0 | 728  | Stage I      | T1  | None         | 3.4 - Fibrous Septa       | Alcohol consumption                | Hepatitis B Surface Antigen | 58.36501265 | 31.17096798  | 4.168904839 | 3.579579729 |
| TCGA-CC-A7F  | MALE   | 59 | Hepatocellular Carcinoma | 1 | 649  | Stage IIA    | T3  | NotAvailable | NotAvailable              | Alcohol consumption                | Hepatitis C Antibody        | 68.41921755 | 5.01293472   | 1.80324018  | 5.576664224 |
| TCGA-G3-A7M9 | MALE   | 70 | Hepatocellular Carcinoma | 1 | 56   | Stage IIB    | T3b | Macro        | 6 - Established Cirrhosis | Hemochromatosis                    | Hepatitis C Antibody        | 57.0626093  | 12.76573097  | 12.60379679 | 5.920305874 |
| TCGA-DD-A1EF | FEMALE | 57 | Hepatocellular Carcinoma | 1 | 394  | Stage I      | T1  | None         | 3.4 - Fibrous Septa       | No History of Primary Risk Factors | Hepatitis B Surface Antigen | 29.23257981 | 1.56849509   | 23.12914344 | 3.723312112 |
| TCGA-DD-A4N5 | MALE   | 77 | Hepatocellular Carcinoma | 1 | 802  | Stage IIA    | T3a | Micro        | NotAvailable              | Alcohol consumption                | Hepatitis B Surface Antigen | 1.051931279 | 27.38019748  | 7.332226641 | 4.85295467  |
| TCGA-CC-A3M9 | MALE   | 45 | Hepatocellular Carcinoma | 1 | 300  | Stage IIA    | T3  | NotAvailable | NotAvailable              | Alcohol consumption                | Hepatitis C Antibody        | 12.51887871 | 18.24087587  | 9.548144473 | 2.382155337 |
| TCGA-M-A7G5  | MALE   | 63 | Hepatocellular Carcinoma | 0 | 688  | Stage II     | T2  | None         | 6 - Established Cirrhosis | Alcohol consumption                | HCV Genotype                | 337.3240035 | 275.6848495  | 5.292937872 | 2.644820116 |
| TCGA-ED-A7X0 | MALE   | 29 | Hepatocellular Carcinoma | 0 | 427  | Stage IIA    | T3a | Micro        | NotAvailable              | No History of Primary Risk Factors | Hepatitis C Antibody        | 29.86465449 | 6.937619317  | 1.862672971 | 1.395479541 |
| TCGA-ED-A6G3 | MALE   | 35 | Hepatocellular Carcinoma | 0 | 406  | Stage IIA    | T3a | Micro        | NotAvailable              | Alcohol consumption                | Hepatitis B Surface Antigen | 1.701117377 | 23.811682371 | 6.613418521 | 4.41439382  |
| TCGA-SR-A4AM | FEMALE | 65 | Hepatocellular Carcinoma | 1 | 46   | Stage II     | T2  | Micro        | 6 - Established Cirrhosis | No History of Primary Risk Factors | Hepatitis C Antibody        | 40.78570903 | 11.02734657  | 3.397863446 | 2.871653988 |
| TCGA-Y2-A9H5 | FEMALE | 59 | Hepatocellular Carcinoma | 1 | 555  | Stage I      | T1  | None         | 1.2 - Portal Fibrosis     | Alcohol consumption                | Hepatitis B Surface Antigen | 82.77895557 | 27.63646264  | 3.750127808 | 3.369707914 |
| TCGA-DD-A4NP | MALE   | 32 | Hepatocellular Carcinoma | 0 | 3398 | Stage I      | T1  | None         | 0 - No Fibrosis           | No History of Primary Risk Factors | Hepatitis B Surface Antigen | 47.88665945 | 13.87769756  | 2.923237618 | 2.10398802  |
| TCGA-CC-A7K  | MALE   | 59 | Hepatocellular Carcinoma | 1 | 262  | Stage IIA    | T3  | NotAvailable | NotAvailable              | Alcohol consumption                | Hepatitis C Antibody        | 123.7561075 | 8.521139991  | 10.81419073 | 8.58132072  |
| TCGA-ED-A6G3 | MALE   | 76 | Hepatocellular Carcinoma | 0 | 447  | Stage I      | T1  | None         | 0 - No Fibrosis           | Alcohol consumption                | Hepatitis C Antibody        | 136.4911631 | 3.258287589  | 1.555516943 | 1.287162383 |
| TCGA-CC-A8V7 | MALE   | 57 | Hepatocellular Carcinoma | 0 | 0    | Stage IIA    | T3a | Micro        | NotAvailable              | Alcohol consumption                | Hepatitis C Antibody        | 7.211537814 | 9.375382574  | 22.6052698  | 1.828495358 |
| TCGA-DD-A3A8 | MALE   | 75 | Hepatocellular Carcinoma | 1 | 11   | Stage II     | T2  | None         | 0 - No Fibrosis           | No History of Primary Risk Factors | Hepatitis B Surface Antigen | 59.41362448 | 12.69470208  | 2.54449943  | 2.511960073 |
| TCGA-G3-A4V6 | FEMALE | 53 | Hepatocellular Carcinoma | 1 | 65   | Stage IIA    | T3a | Micro        | 0 - No Fibrosis           | No History of Primary Risk Factors | Hepatitis B Surface Antigen | 77.93195987 | 25.60163645  | 8.185790789 | 2.922941336 |
| TCGA-Y2-A9H3 | MALE   | 45 | Hepatocellular Carcinoma | 0 | 1516 | Stage II     | T2  | Micro        | 1.2 - Portal Fibrosis     | Alcohol consumption                | Hepatitis C Antibody        | 9.9427272   | 12.39870232  | 2.868149414 | 1.001086034 |
| TCGA-CC-A7G  | MALE   | 47 | Hepatocellular Carcinoma | 1 | 299  | Stage II     | T2  | NotAvailable | NotAvailable              | Alcohol consumption                | Hepatitis C Antibody        | 170.765947  | 75.51058812  | 11.98105806 | 4.360017857 |
| TCGA-DD-A1EG | MALE   | 76 | Hepatocellular Carcinoma | 1 | 1272 | Stage I      | T1  | None         | 1.2 - Portal Fibrosis     | Alcohol consumption                | Hepatitis B Surface Antigen | 52.3845474  | 11.453666594 | 4.979318175 | 3.341142142 |
| TCGA-DD-A73C | FEMALE | 65 | Hepatocellular Carcinoma | 0 | 701  | Stage IIA    | T3  | None         | 0 - No Fibrosis           | No History of Primary Risk Factors | Hepatitis B Surface Antigen | 237.5358837 | 7.868085991  | 3.787100048 | 8.746192048 |
| TCGA-G3-A7M6 | MALE   | 31 | Hepatocellular Carcinoma | 0 | 430  | Stage I      | T1  | None         | 6 - Established Cirrhosis | Alcohol consumption                | Hepatitis C Antibody        | 8.21664013  | 4.199193344  | 0.966959785 | 1.651170104 |
| TCGA-CC-A7L  | MALE   | 61 | Hepatocellular Carcinoma | 1 | 278  | Stage IIA    | T3  | NotAvailable | NotAvailable              | Alcohol consumption                | Hepatitis C Antibody        | 226.4494305 | 17.50475891  | 2.623369117 | 11.45662986 |
| TCGA-DD-A4NH | FEMALE | 65 | Hepatocellular Carcinoma | 0 | 917  | Stage IIB    | T3b | Macro        | 1.2 - Portal Fibrosis     | Alcohol consumption                | Hepatitis B Surface Antigen | 67.57764516 | 18.73959535  | 5.942658827 | 3.879539714 |
| TCGA-WX-A4M4 | FEMALE | 64 | Hepatocellular Carcinoma | 0 | 615  | Stage I      | T1  | None         | 6 - Established Cirrhosis | Non-Alcoholic Fatty Liver Disease  | Hepatitis C Antibody        | 35.74782924 | 11.48929528  | 2.188843862 | 3.65248036  |
| TCGA-UB-A7MD | MALE   | 67 | Hepatocellular Carcinoma | 1 | 52   | Stage I      | T1  | Micro        | 6 - Established Cirrhosis | Alcohol consumption                | Hepatitis C Antibody        | 61.6625228  | 7.390882671  | 5.922962419 | 2.488767735 |
| TCGA-CC-A8JD | MALE   | 45 | Hepatocellular Carcinoma | 1 | 304  | Stage IIA    | T3  | NotAvailable | NotAvailable              | Alcohol consumption                | Hepatitis C Antibody        | 54.3595781  | 63.10029463  | 12.04761673 | 7.078001957 |
| TCGA-ED-A7PY | FEMALE | 20 | Hepatocellular Carcinoma | 0 | 390  | Stage II     | T2  | Micro        | NotAvailable              | No History of Primary Risk Factors | Hepatitis B Surface Antigen | 22.87971457 | 25.0985338   | 4.231924005 | 1.806584609 |
| TCGA-DD-A4HK | FEMALE | 50 | Hepatocellular Carcinoma | 1 | 1210 | Stage IIA    | T3  | None         | 0 - No Fibrosis           | No History of Primary Risk Factors | Hepatitis B Surface Antigen | 142.4113918 | 6.358612583  | 1.020260009 | 2.436914152 |
| TCGA-DD-A1EJ | FEMALE | 71 | Hepatocellular Carcinoma | 1 | 1005 | Stage IIC    | T1  | None         | 0 - No Fibrosis           | No History of Primary Risk Factors | Hepatitis B Surface Antigen | 196.0064199 | 65.64142775  | 19.57188118 | 10.64699004 |
| TCGA-CC-S2S8 | MALE   | 48 | Hepatocellular Carcinoma | 1 | 129  | Stage II     | T2  | None         | NotAvailable              | NotAvailable                       | Hepatitis C Antibody        | 138.1099645 | 20.85487555  | 14.05592295 | 7.458566297 |
| TCGA-DD-A3A6 | FEMALE | 72 | Hepatocellular Carcinoma | 1 | 3258 | Stage II     | T2  | Micro        | 0 - No Fibrosis           | No History of Primary Risk Factors | Hepatitis B Surface Antigen | 5.82781927  | 5.014043722  | 64.9303311  | 0.940745129 |
| TCGA-Y2-A9G3 | MALE   | 68 | Hepatocellular Carcinoma | 0 | 2442 | Stage I      | T1  | NotAvailable | NotAvailable              | Alcohol consumption                | Hepatitis B Surface Antigen | 77.9942282  | 24.44129941  | 2.41069751  | 2.96889247  |
| TCGA-DD-A1B  | MALE   | 73 | Hepatocellular Carcinoma | 1 | 14   | Stage I      | T1  | None         | 6 - Established Cirrhosis | Non-Alcoholic Fatty Liver Disease  | Hepatitis B Surface Antigen | 27.38010205 | 3.42662504   | 4.745184259 | 1.502475647 |
| TCGA-DD-A4NE | FEMALE | 75 | Hepatocellular Carcinoma | 1 | 660  | Stage IIA    | T3a | None         | 0 - No Fibrosis           | No History of Primary Risk Factors | Hepatitis C Virus RNA       | 137.013847  | 12.6953984   | 1.051236719 | 4.462108729 |
| TCGA-K7-A6G5 | MALE   | 66 | Hepatocellular Carcinoma | 0 | 512  | Stage I      | T1  | None         | NotAvailable              | Alcohol consumption                | HCV Genotype                | 238.5316393 | 58.16386567  | 1.88907223  | 2.179768743 |
| TCGA-CC-S2S9 | FEMALE | 60 | Hepatocellular Carcinoma | 0 | 250  | Stage IIC    | T4  | NotAvailable | NotAvailable              | No History of Primary Risk Factors | Hepatitis C Antibody        | 16.36629616 | 25.18456077  | 8.697402042 | 1.908991486 |
| TCGA-Y2-A9H8 | FEMALE | 85 | Hepatocellular Carcinoma | 1 | 633  | NotAvailable | T1  | NotAvailable | NotAvailable              | Alcohol consumption                | Hepatitis C Virus RNA       | 130.8545634 | 23.56848438  | 4.54801136  | 2.189085139 |
| TCGA-HP-A8M2 | MALE   | 78 | Hepatocellular Carcinoma | 1 | 91   | Stage I      | T1  | None         | NotAvailable              | No History of Primary Risk Factors | Hepatitis C Antibody        | 66.24263396 | 20.30384517  | 2.421894828 | 2.894109103 |
| TCGA-ED-A8Q9 | FEMALE | 50 | Hepatocellular Carcinoma | 1 | 56   | Stage IIA    | T3a | Micro        | NotAvailable              | No History of Primary Risk Factors | Hepatitis C Antibody        | 125.0283171 | 36.577454002 | 9.700002651 | 7.06351962  |
